# Supplementary material
Source: Springer Nature journal article supplement (https://www.springermedizin.de/resource/supplementary/12889_2009_1868_MOESM4_ESM.pdf/9504244)

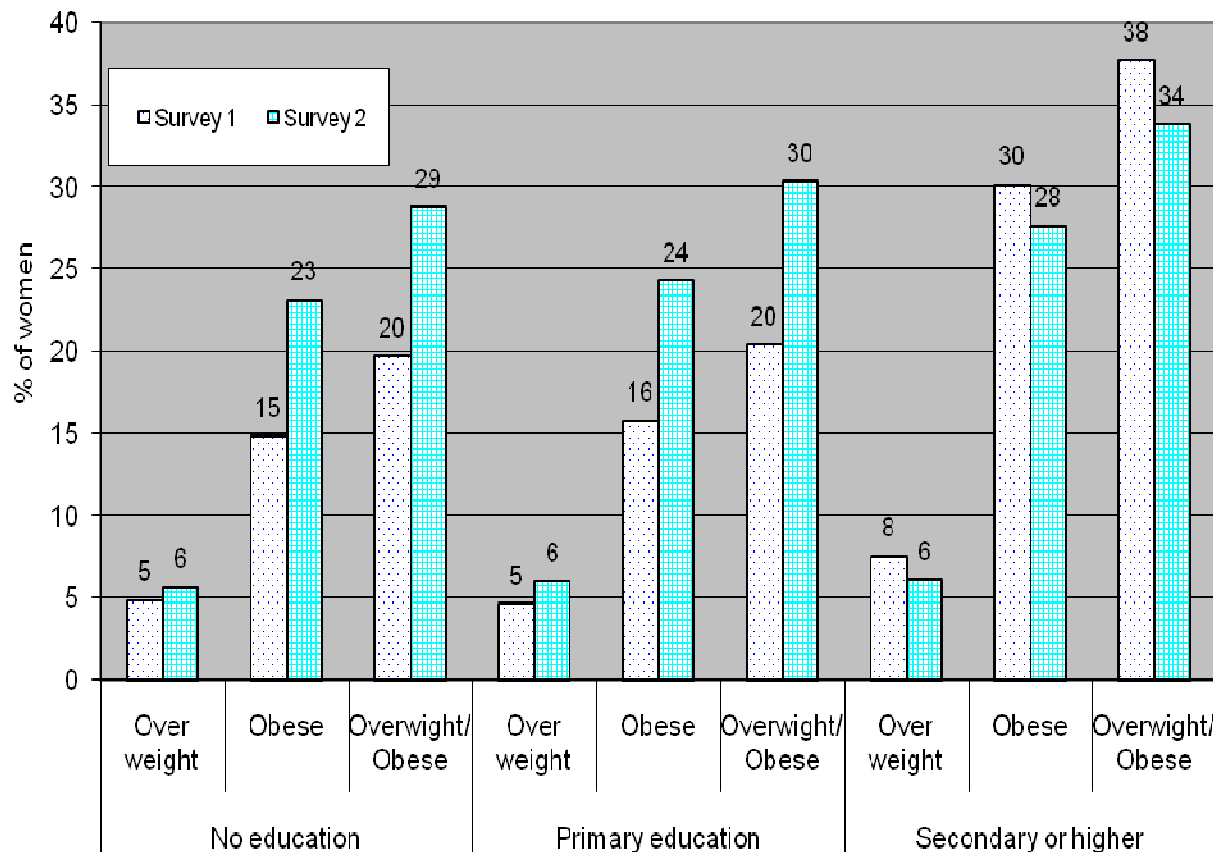

Supplement: MOESM4 [file 9504244]
